# Supplementary material
Source: Springer Nature journal article supplement (https://www.springermedizin.de/resource/supplementary/12874_2013_1053_MOESM9_ESM.pdf/9433424)

|            |      |      |      |      |
|------------|------|------|------|------|
| Obese      | 9.8  | 13.5 | 16.3 | 19.5 |
| Overweight | 19.3 | 21.1 | 23.7 | 24.8 |
| Healthy    | 70.9 | 65.4 | 60.0 | 55.6 |

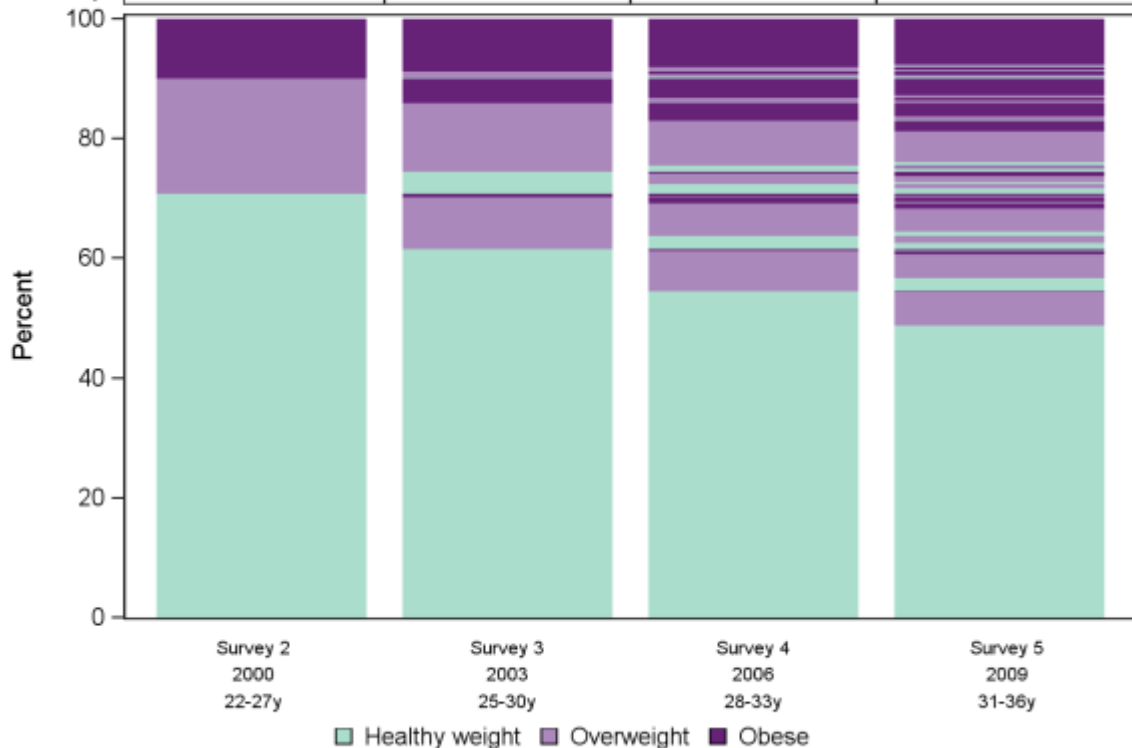

Supplement: MOESM9 [file 9433424]
